# Supplementary material
Source: publisher figshare collection journal article supplement (https://acs.figshare.com/ndownloader/files/4615189)
Supplement: Supplementary file 1 [file 4615189]

# Chiral bimetallic assemblies and coordination polymers based on tetracyanonickelate: a striking reversible structural transformation

*Olha Sereda, Antonia Neels, Fritz Stoeckli and Helen Stoeckli-Evans\**

Institut de Microtechnique, Université de Neuchâtel, Rue Emile-Argand 11, CP 158,  
CH 2009 Neuchâtel, Switzerland

## Supporting Information

**Figure S1.** The Reitveld refinement of PXRD for  $\{[\text{Cu}(\text{R,Rchxn})_2][\text{Ni}(\text{CN})_4]\}_\infty$  (**3**),  
(— calculated pattern, + observed pattern). The bottom curve is the difference  
curve on the same intensity scale.

**Table S1.** Enthalpies of immersion,  $\Delta_i H$ , of compound **3** into water, methanol and acetonitrile.

**Figure S1.** The Reitveld refinement of PXRD for  $\{[\text{Cu}(\text{R,Rchxn})_2][\text{Ni}(\text{CN})_4]\}_\infty$  (**3**), (— calculated pattern, + observed pattern). The bottom curve is the difference curve on the same intensity scale.

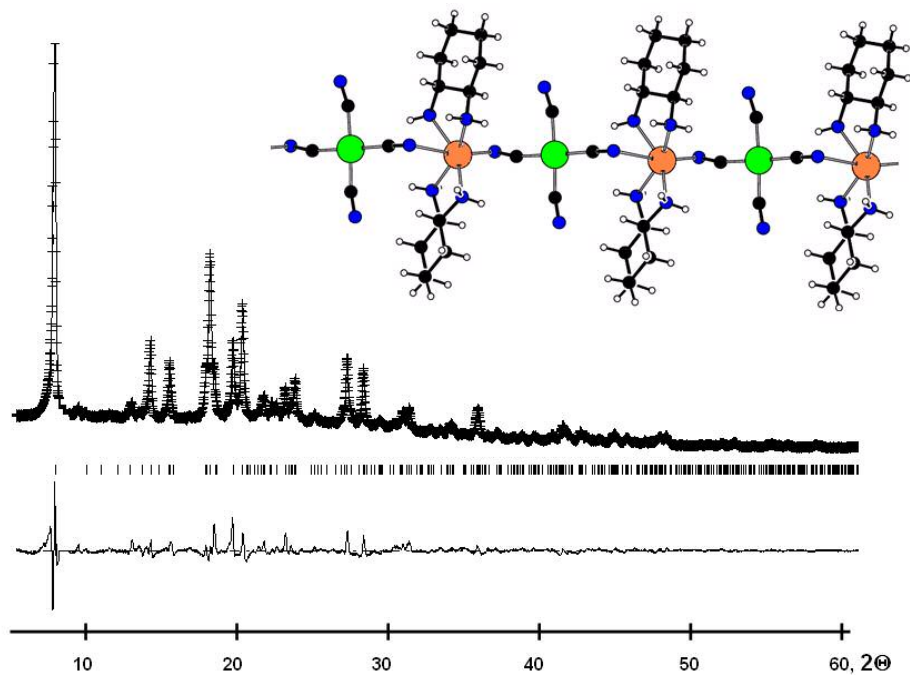

### Immersion calorimetry

Immersion calorimetry experiments were carried out at 293 K on samples of 0.014-0.020 g using a TIAN-CALVET type calorimeter.<sup>[1-3]</sup> The outgassed samples of **2** were placed in the calorimetric cells which in turn are placed in a water bath controlled by a thermo-regulator system LUDA MS. The thermal flow was monitored by the current through 180 Cu/constantan thermocouples connected to a nanovoltmeter PREMA 8017. The integral of the voltage versus time curve, is proportional to the energy generated during the immersion process, typically between 1 and 10 J. The accuracy varies between 4 and 5 % depending on the absolute energy liberated in the process and on the amount of solid used.

**Table S1.** Enthalpies of immersion,  $\Delta_i H$ , of compound **3** into water, methanol and acetonitrile.

| Solvent      | Weight, g | $-\Delta_i H$ , J/g |
|--------------|-----------|---------------------|
| Water        | 0.0095    | 54.95               |
|              | 0.0116    | 56.42               |
|              | 0.0145    | 54.01               |
|              | 0.0121    | 57.41               |
| Methanol     | 0.0140    | 40.83               |
|              | 0.0175    | 38.65               |
|              | 0.0161    | 41.09               |
|              | 0.0140    | 40.24               |
| Acetonitrile | 0.0084    | 18.64               |
|              | 0.0110    | 16.90               |
|              | 0.0094    | 22.03               |

[1]. R. C. Bansal, J. B. Donnet, F. Stoeckli, *Active Carbon*, Marcel Dekker, New York, **1988**.

[2]. F. Stoeckli, D. Hugli-Cleary, T. A. Centeno, *J. Eur. Ceram. Soc.* **1998**, 18, 1177.

[3]. F. Stoeckli, *Russ. Chem. Bull. Int. Ed.* **2001**, 50, 2265.
